# Supplementary material for: Population Levels and Geographic Distribution of HIV RNA in Rural Ugandan and Kenyan Communities and Sero-Discordant Couples: a Cross-Sectional Analysis
Source: PubMed Central journal article supplement — Lancet HIV. Author manuscript; Available in PMC 2018 Mar 1. (PMC5730457; doi:10.1016/s2352-3018(16)30220-x), 2016-12-16
Supplement: NIHMS838655-supplement.pdf [file NIHMS838655-supplement.pdf]

Appendix 1. Community Level Demographic Descriptors

| Country     | Community   | Parish | Gender |       |       |       | Occupation          |                       |                |                | Age            |                |                |            |         |         | Marital status  |         |                              | Household wealth |              |              |                               |                             | Mode of HIV testing |                  |       |       |       |       |       |       |       |       |       |       |       |       |       |       |       |       |       |       |       |       |
|-------------|-------------|--------|--------|-------|-------|-------|---------------------|-----------------------|----------------|----------------|----------------|----------------|----------------|------------|---------|---------|-----------------|---------|------------------------------|------------------|--------------|--------------|-------------------------------|-----------------------------|---------------------|------------------|-------|-------|-------|-------|-------|-------|-------|-------|-------|-------|-------|-------|-------|-------|-------|-------|-------|-------|-------|-------|
|             |             |        | Female |       | Male  |       | Framer/agricultural | Non-agricultural work | 15 to 20 years | 21 to 30 years | 31 to 40 years | 41 to 50 years | 51 to 60 years | > 60 years | Missing | Married | Single/divorced | Missing | 1st quintile (lowest wealth) | 2nd quintile     | 3rd quintile | 4th quintile | 5th quintile (highest wealth) | Not via CHC or Home Testing | At CHC              | Via home testing |       |       |       |       |       |       |       |       |       |       |       |       |       |       |       |       |       |       |       |       |
|             |             |        | n      | %     | n     | %     | n                   | %                     | n              | %              | n              | %              | n              | %          | n       | %       | n               | %       | n                            | %                | n            | %            | n                             | %                           | n                   | %                |       |       |       |       |       |       |       |       |       |       |       |       |       |       |       |       |       |       |       |       |
| West Uganda | Bugamba     |        | 2896   | 55.4% | 2226  | 44.6% | 3169                | 60.6%                 | 2053           | 39.3%          | 1277           | 24.4%          | 1290           | 24.7%      | 1014    | 19.4%   | 686             | 13.1%   | 437                          | 8.3%             | 518          | 9.9%         | 0                             | 0.0%                        | 3154                | 60.3%            | 2058  | 39.4% | 0     | 0.0%  | 1024  | 19.6% | 1099  | 21.0% | 1149  | 22.0% | 1163  | 22.2% | 787   | 15.0% | 0     | 0.0%  | 4366  | 83.6% | 856   | 16.3% |
|             | Kobonjo     |        | 1652   | 55.2% | 1289  | 44.8% | 1129                | 61.6%                 | 700            | 38.4%          | 1002           | 18.4%          | 1067           | 20.2%      | 688     | 13.0%   | 236             | 4.5%    | 131                          | 2.5%             | 168          | 3.2%         | 208                           | 4.0%                        | 0                   | 0.0%             | 1661  | 31.6% | 596   | 11.3% | 696   | 13.3% | 588   | 11.2% | 574   | 10.9% | 601   | 11.5% | 2402  | 45.6% | 389   | 7.2%  | 1159  | 21.8% |       |       |
|             | Rwogbo      |        | 1314   | 55.3% | 1077  | 44.6% | 1640                | 59.7%                 | 971            | 40.2%          | 590            | 24.4%          | 623            | 25.8%      | 405     | 15.8%   | 315             | 12.0%   | 202                          | 8.3%             | 220          | 9.3%         | 0                             | 0.0%                        | 1478                | 61.3%            | 925   | 38.3% | 0     | 0.0%  | 438   | 18.1% | 439   | 18.2% | 551   | 22.8% | 589   | 24.4% | 394   | 16.3% | 0     | 0.0%  | 1944  | 60.0% | 467   | 19.3% |
|             | Kiveo       |        | 2296   | 57.1% | 1678  | 42.8% | 2640                | 68.4%                 | 1334           | 33.5%          | 178            | 4.4%           | 1094           | 27.5%      | 855     | 21.0%   | 565             | 14.2%   | 401                          | 10.0%            | 381          | 9.5%         | 6                             | 0.1%                        | 1807                | 66.7%            | 137   | 34.1% | 7     | 0.1%  | 1802  | 26.8% | 986   | 24.8% | 759   | 18.8% | 595   | 14.9% | 574   | 14.4% | 0     | 0.0%  | 3446  | 66.7% | 528   | 13.2% |
|             | Neheni      |        | 410    | 57.1% | 308   | 42.8% | 412                 | 57.3%                 | 212            | 29.5%          | 101            | 14.0%          | 271            | 37.1%      | 181     | 25.2%   | 93              | 12.9%   | 66                           | 9.1%             | 65           | 9.0%         | 4                             | 0.5%                        | 147.4%              | 24.9%            | 34.9% | 7     | 0.9%  | 162   | 25.3% | 133   | 18.5% | 97    | 13.3% | 94    | 13.0% | 205   | 28.5% | 0     | 0.0%  | 689   | 77.8% | 159   | 22.1% |       |
|             | Miboma      |        | 1880   | 57.6% | 1370  | 42.3% | 2228                | 68.4%                 | 1028           | 31.5%          | 566            | 17.3%          | 807            | 24.1%      | 474     | 14.3%   | 335             | 10.2%   | 316                          | 9.7%             | 0            | 0.0%         | 2146                          | 65.5%                       | 108                 | 34.0%            | 0     | 0.0%  | 880   | 27.0% | 883   | 26.1% | 653   | 20.0% | 601   | 18.3% | 369   | 11.3% | 0     | 0.0%  | 2887  | 68.6% | 369   | 11.3% |       |       |
|             | Kilega      |        | 2040   | 57.6% | 1516  | 42.3% | 2077                | 58.4%                 | 1429           | 40.5%          | 1053           | 29.5%          | 976            | 27.2%      | 803     | 21.8%   | 562             | 15.1%   | 381                          | 8.1%             | 487          | 13.0%        | 5                             | 0.1%                        | 2383                | 55.1%            | 1918  | 44.7% | 1     | 0.0%  | 934   | 21.1% | 1819  | 23.7% | 1117  | 26.0% | 750   | 18.4% | 425   | 9.9%  | 0     | 0.0%  | 3310  | 65.1% | 574   | 11.3% |
|             | Niyakibigwa |        | 309    | 59.0% | 203   | 40.9% | 782                 | 50.8%                 | 757            | 48.1%          | 380            | 24.0%          | 336            | 21.8%      | 294     | 19.5%   | 233             | 15.0%   | 142                          | 9.2%             | 154          | 10.0%        | 2                             | 0.1%                        | 842                 | 54.7%            | 895   | 45.1% | 0     | 0.0%  | 419   | 27.2% | 403   | 26.1% | 420   | 27.2% | 218   | 14.1% | 79    | 5.1%  | 0     | 0.0%  | 1310  | 65.1% | 229   | 14.8% |
|             | Ward 1      |        | 864    | 58.1% | 666   | 41.8% | 860                 | 63.8%                 | 481            | 35.8%          | 366            | 26.9%          | 383            | 24.9%      | 319     | 20.9%   | 167             | 11.2%   | 107                          | 7.4%             | 68           | 4.9%         | 1                             | 0.1%                        | 847.4%              | 24.9%            | 349   | 24.9% | 0     | 0.0%  | 377   | 27.4% | 451   | 32.6% | 188   | 13.8% | 158   | 11.6% | 0     | 0.0%  | 1273  | 60.6% | 317   | 18.9% |       |       |
|             | Ward 2      |        | 269    | 56.2% | 208   | 43.8% | 209                 | 43.8%                 | 208            | 43.8%          | 136            | 28.9%          | 103            | 21.5%      | 80      | 16.7%   | 56              | 11.7%   | 36                           | 7.5%             | 26           | 5.6%         | 1                             | 0.2%                        | 240                 | 50.9%            | 233   | 48.8% | 0     | 0.0%  | 44    | 9.2%  | 107   | 22.4% | 78    | 16.3% | 178   | 37.3% | 70    | 14.6% | 0     | 0.0%  | 411   | 67.8% | 102   | 21.3% |
|             | Nalika      |        | 2473   | 53.6% | 2155  | 46.3% | 3003                | 69.5%                 | 1465           | 33.0%          | 1038           | 22.9%          | 1921           | 43.6%      | 875     | 18.8%   | 610             | 13.2%   | 319                          | 6.8%             | 384          | 8.3%         | 8                             | 0.1%                        | 3027                | 65.6%            | 972   | 21.1% | 0     | 0.0%  | 1169  | 25.3% | 1100  | 23.8% | 1053  | 22.8% | 778   | 16.8% | 507   | 11.0% | 0     | 0.0%  | 4011  | 67.8% | 566   | 12.9% |
|             | Kiyeyere    |        | 931    | 53.6% | 803   | 46.3% | 1223                | 70.5%                 | 511            | 29.4%          | 371            | 21.5%          | 467            | 28.0%      | 356     | 20.5%   | 236             | 13.7%   | 134                          | 7.7%             | 148          | 8.5%         | 0                             | 0.0%                        | 1919                | 68.6%            | 543   | 31.3% | 0     | 0.0%  | 471   | 21.7% | 455   | 25.6% | 415   | 23.9% | 267   | 15.3% | 146   | 8.4%  | 0     | 0.0%  | 1543  | 68.9% | 191   | 11.0% |
|             | Nsikka Town |        | 396    | 53.1% | 316   | 46.8% | 705                 | 63.9%                 | 397            | 36.0%          | 273            | 24.7%          | 305            | 27.8%      | 207     | 18.7%   | 143             | 12.9%   | 86                           | 7.8%             | 88           | 7.9%         | 0                             | 0.0%                        | 691                 | 62.7%            | 410   | 37.2% | 0     | 0.0%  | 246   | 22.3% | 255   | 23.1% | 234   | 21.2% | 209   | 20.8% | 137   | 12.4% | 0     | 0.0%  | 925   | 83.9% | 177   | 16.0% |
|             | Nyakibigwa  |        | 477    | 54.7% | 395   | 45.2% | 669                 | 75.5%                 | 213            | 24.4%          | 191            | 21.9%          | 256            | 29.3%      | 149     | 16.7%   | 123             | 14.1%   | 82                           | 9.4%             | 74           | 8.4%         | 3                             | 0.3%                        | 960                 | 64.2%            | 300   | 34.4% | 0     | 0.0%  | 237   | 27.1% | 229   | 26.2% | 179   | 20.5% | 122   | 13.9% | 105   | 12.0% | 0     | 0.0%  | 756   | 68.6% | 165   | 13.1% |
|             | Rwogbo      |        | 479    | 53.2% | 421   | 46.7% | 616                 | 68.4%                 | 284            | 31.5%          | 202            | 22.4%          | 273            | 30.3%      | 166     | 18.4%   | 108             | 12.0%   | 77                           | 8.5%             | 74           | 8.2%         | 5                             | 0.5%                        | 585                 | 65.0%            | 310   | 34.4% | 0     | 0.0%  | 215   | 23.8% | 181   | 20.1% | 225   | 25.0% | 160   | 17.7% | 119   | 13.2% | 0     | 0.0%  | 787   | 87.4% | 113   | 12.6% |
|             | Rubara      |        | 2231   | 55.0% | 1820  | 44.9% | 2245                | 55.4%                 | 1808           | 44.5%          | 972            | 23.9%          | 1099           | 27.1%      | 776     | 19.1%   | 551             | 13.6%   | 329                          | 8.1%             | 334          | 7.9%         | 8                             | 0.1%                        | 2384                | 58.8%            | 1059  | 40.9% | 0     | 0.0%  | 761   | 18.7% | 912   | 22.5% | 789   | 18.9% | 651   | 16.0% | 958   | 23.0% | 0     | 0.0%  | 3078  | 75.9% | 973   | 24.0% |
|             | Nnyamya     |        | 1177   | 56.3% | 911   | 43.6% | 1190                | 55.0%                 | 598            | 44.9%          | 479            | 22.9%          | 590            | 28.2%      | 428     | 19.9%   | 294             | 14.0%   | 162                          | 7.7%             | 155          | 7.4%         | 2                             | 0.0%                        | 1387                | 61.1%            | 799   | 38.2% | 0     | 0.0%  | 459   | 21.0% | 515   | 24.6% | 444   | 21.2% | 342   | 16.3% | 348   | 16.6% | 0     | 0.0%  | 1734  | 63.0% | 354   | 16.9% |
|             | Rugazi      |        | 2357   | 60.1% | 1551  | 39.8% | 1983                | 51.0%                 | 1905           | 48.0%          | 782            | 20.1%          | 1064           | 27.3%      | 790     | 20.0%   | 420             | 10.7%   | 368                          | 9.4%             | 404          | 10.3%        | 6                             | 0.1%                        | 2213                | 56.9%            | 1069  | 42.9% | 18    | 0.4%  | 831   | 21.2% | 1187  | 30.0% | 1020  | 26.2% | 565   | 14.5% | 207   | 6.8%  | 0     | 0.0%  | 3351  | 83.6% | 637   | 16.3% |
|             | Buzungu     |        | 635    | 58.9% | 442   | 41.0% | 742                 | 68.8%                 | 335            | 31.1%          | 206            | 19.0%          | 295            | 27.3%      | 228     | 21.1%   | 147             | 13.8%   | 108                          | 9.8%             | 96           | 8.9%         | 1                             | 0.0%                        | 665                 | 61.7%            | 420   | 38.1% | 18    | 1.6%  | 214   | 19.8% | 298   | 27.8% | 301   | 27.9% | 178   | 16.5% | 48    | 4.3%  | 0     | 0.0%  | 1109  | 65.3% | 149   | 10.8% |
|             | Magamba     |        | 866    | 61.1% | 544   | 38.8% | 985                 | 61.7%                 | 615            | 38.2%          | 312            | 22.2%          | 382            | 25.1%      | 292     | 20.8%   | 167             | 11.9%   | 131                          | 9.3%             | 146          | 10.4%        | 4                             | 0.2%                        | 780                 | 55.7%            | 416   | 44.0% | 0     | 0.0%  | 340   | 24.3% | 474   | 33.8% | 359   | 25.4% | 149   | 10.8% | 78    | 5.7%  | 0     | 0.0%  | 1309  | 61.3% | 261   | 18.8% |
|             | Rugazi      |        | 769    | 59.6% | 565   | 40.3% | 666                 | 48.4%                 | 375            | 27.5%          | 265            | 18.7%          | 447            | 29.9%      | 270     | 19.1%   | 166             | 11.7%   | 131                          | 9.2%             | 162          | 11.4%        | 1                             | 0.0%                        | 768                 | 54.4%            | 642   | 45.4% | 0     | 0.0%  | 277   | 19.6% | 415   | 29.4% | 300   | 25.9% | 238   | 18.8% | 121   | 8.5%  | 0     | 0.0%  | 1178  | 82.0% | 253   | 17.9% |
|             | Ruhoko      |        | 747    | 55.8% | 584   | 44.1% | 7216                | 59.5%                 | 4046           | 40.4%          | 717            | 19.2%          | 862            | 26.3%      | 733     | 22.2%   | 500             | 13.4%   | 341                          | 9.1%             | 429          | 11.5%        | 4                             | 0.1%                        | 2198                | 69.0%            | 1020  | 40.9% | 0     | 0.0%  | 692   | 20.3% | 788   | 21.1% | 811   | 21.7% | 824   | 22.1% | 607   | 16.3% | 0     | 0.0%  | 2944  | 65.0% | 422   | 11.7% |
|             | Kanyankwale |        | 849    | 59.2% | 583   | 43.7% | 744                 | 56.1%                 | 584            | 43.9%          | 249            | 18.6%          | 356            | 26.4%      | 254     | 19.8%   | 181             | 13.5%   | 124                          | 9.3%             | 158          | 11.6%        | 1                             | 0.0%                        | 805                 | 60.4%            | 528   | 39.4% | 0     | 0.0%  | 284   | 21.3% | 346   | 25.9% | 306   | 22.9% | 240   | 18.0% | 156   | 11.7% | 0     | 0.0%  | 1169  | 61.0% | 153   | 11.4% |
|             | Kiyegye     |        | 1328   | 55.5% | 1022  | 44.4% | 1468                | 61.4%                 | 822            | 38.5%          | 488            | 19.9%          | 626            | 26.1%      | 489     | 20.4%   | 319             | 13.3%   | 217                          | 9.0%             | 211          | 9.3%         | 0                             | 0.0%                        | 1393                | 58.2%            | 594   | 41.5% | 0     | 0.0%  | 408   | 17.0% | 442   | 19.0% | 505   | 21.1% | 584   | 24.4% | 451   | 18.8% | 1     | 0.0%  | 1941  | 81.2% | 448   | 18.7% |
| Nnyamya     |             | 2837   | 55.3%  | 2176  | 44.6% | 3738  | 47.2%               | 2093                  | 26.9%          | 1917           | 24.2%          | 1523           | 19.5%          | 987        | 12.6%   | 623     | 8.0%            | 388     | 5.0%                         | 389              | 5.0%         | 0            | 0.0%                          | 2386                        | 59.0%               | 1055             | 42.9% | 12    | 0.3%  | 736   | 20.3% | 785   | 20.9% | 738   | 20.0% | 569   | 15.8% | 0     | 0.0%  | 2467  | 64.4% | 455   | 11.6% |       |       |       |
| Nkwana      |             | 1331   | 57.5%  | 961   | 42.4% | 1483  | 54.9%               | 1019                  | 45.0%          | 603            | 22.2%          | 631            | 24.5%          | 402        | 15.0%   | 292     | 8.4%            | 270     | 11.9%                        | 14               | 0.6%         | 1067         | 40.0%                         | 981                         | 43.3%               | 0                | 0.0%  | 480   | 18.2% | 451   | 19.9% | 448   | 21.2% | 371   | 16.4% | 0     | 0.0%  | 1788  | 79.3% | 463   | 20.6% |       |       |       |       |       |
| Rwogbo      |             | 796    | 56.4%  | 615   | 43.5% | 925   | 35.0%               | 616                   | 24.9%          | 278            | 19.7%          | 401            | 28.4%          | 317        | 22.4%   | 183     | 13.2%           | 114     | 8.0%                         | 118              | 8.3%         | 5            | 0.3%                          | 829                         | 58.7%               | 577              | 40.8% | 12    | 0.8%  | 256   | 18.1% | 412   | 28.1% | 258   | 18.2% | 188   | 13.3% | 0     | 0.0%  | 740   | 52.9% | 664   | 47.0% |       |       |       |
| East Uganda | Bugono      |        | 2080   | 55.2% | 1687  | 44.7% | 2248                | 59.6%                 | 1519           | 40.3%          | 1020           | 27.0%          | 934            | 24.7%      | 648     | 17.2%   | 476             | 12.6%   | 294                          | 7.8%             | 396          | 10.4%        | 0                             | 0.0%                        | 2210                | 58.6%            | 1547  | 41.0% | 0     | 0.0%  | 631   |       |       |       |       |       |       |       |       |       |       |       |       |       |       |       |
